# Supplementary material
Source: HighWire-hosted journal article supplement (http://www.cmaj.ca/highwire/filestream/69798/field_highwire_adjunct_files/1/170892-res-2-at.pdf)
Supplement: 170892-res-2-at.pdf [file 170892-res-2-at.pdf]

**Appendix 2 (as supplied by the authors): Top 10 primary diagnoses of ED visit after 5pm on same day as home care nursing visit, by patient group**

| <b>Primary Diagnosis (ICD-10-CA)</b>                                               | <b>%</b> |
|------------------------------------------------------------------------------------|----------|
| <b>Long Stay</b>                                                                   |          |
| N39.0 Urinary tract infection, site not specified                                  | 7.89     |
| L03.11 Cellulitis of lower limb                                                    | 5.13     |
| I50.0 Congestive heart failure                                                     | 3.55     |
| A41.9 Sepsis, unspecified                                                          | 3.06     |
| J18.9 Pneumonia, unspecified                                                       | 2.17     |
| R53 Malaise and fatigue                                                            | 2.07     |
| T83.0 Mechanical complication of urinary (indwelling) catheter                     | 2.07     |
| R10.4 Other and unspecified abdominal pain                                         | 1.97     |
| R33 Retention of urine                                                             | 1.78     |
| R06.0 Dyspnoea                                                                     | 1.68     |
| <b>Short Stay</b>                                                                  |          |
| Z51 Other Medical care                                                             | 13.90    |
| L03.11 Cellulitis of lower limb                                                    | 5.25     |
| T82.5 Mechanical complication of other cardiac and vascular devices and implants   | 3.19     |
| T81.4 Infection following a procedure, not elsewhere classified                    | 3.09     |
| R33 Retention of urine                                                             | 2.57     |
| N39.0 Urinary tract infection, site not specified                                  | 2.06     |
| T81.0 Haemorrhage and haematoma complicating a procedure, not elsewhere classified | 2.06     |
| R50.9 Fever, unspecified                                                           | 1.96     |
| D70.0 Neutropenia                                                                  | 1.85     |
| Z45.2 Adjustment and management of vascular access device                          | 1.85     |
